# Supplementary material for: Development of a peer support intervention to improve the experience and outcomes of discharge from inpatient mental health care: the role of experiential knowledge in a coproduced approach
Source: Springer Nature journal article supplement (doi:10.1186/s13104-021-05735-0), 2021-08-21

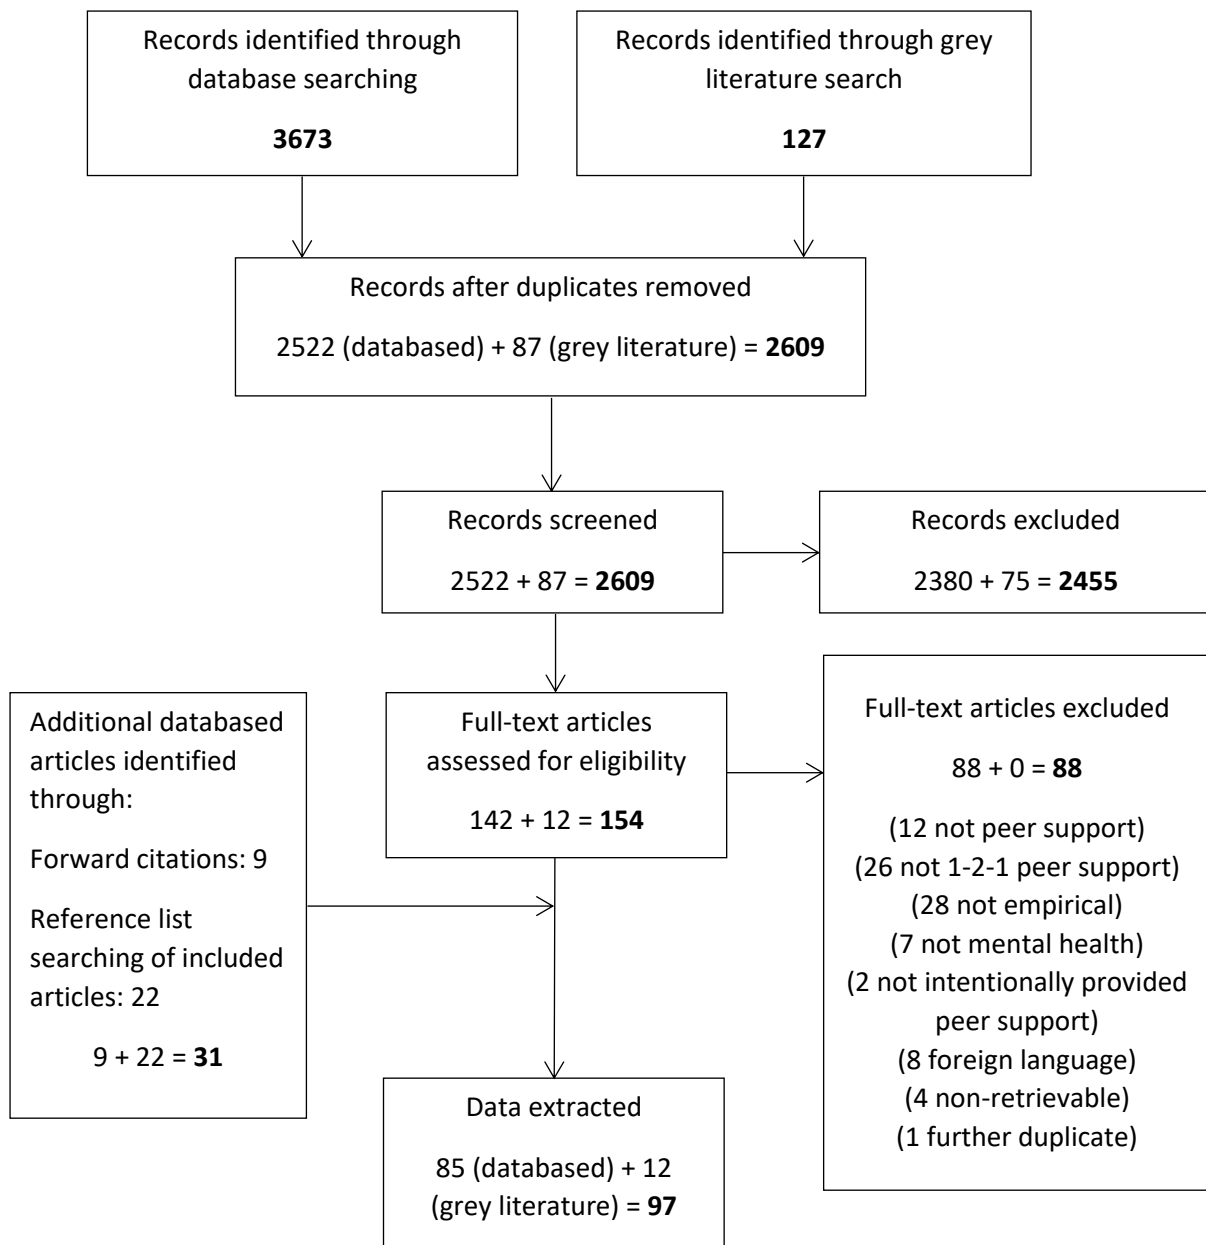

Supplement: MOESM1 [file 13104_2021_5735_MOESM1_ESM.pdf]
