# Supplementary material for: Development of a peer support intervention to improve the experience and outcomes of discharge from inpatient mental health care: the role of experiential knowledge in a coproduced approach
Source: Springer Nature journal article supplement (doi:10.1186/s13104-021-05735-0), 2021-08-21
Supplement: MOESM2 [file 13104_2021_5735_MOESM2_ESM.pdf]

| Domain                                                                           | Label                                                                                                                                                                                     | Descriptor                                                                                                                                                                                                                       | Source             |
|----------------------------------------------------------------------------------|-------------------------------------------------------------------------------------------------------------------------------------------------------------------------------------------|----------------------------------------------------------------------------------------------------------------------------------------------------------------------------------------------------------------------------------|--------------------|
| Domain 1:<br>Recruitment<br>and role<br>description                              | Person specification to include definition of lived experience                                                                                                                            |                                                                                                                                                                                                                                  | LEAP               |
|                                                                                  | Person specification to include having been an inpatient                                                                                                                                  | Desirable rather than essential criteria                                                                                                                                                                                         | LEAP               |
|                                                                                  | Person specification to include the ability to reflect on personal experiences                                                                                                            | Personal experiences of mental distress, recovery, and giving and receiving support                                                                                                                                              | LEAP, Review       |
|                                                                                  | Peer leadership in recruitment and interview process essential                                                                                                                            | Ideally should be the Peer Worker Coordinator                                                                                                                                                                                    | LEAP, Review       |
|                                                                                  | Person specification to include ability to record and report                                                                                                                              |                                                                                                                                                                                                                                  | LEAP, Review       |
|                                                                                  | Interview to ask how working as a peer worker fits with future career aspirations                                                                                                         |                                                                                                                                                                                                                                  | LEAP               |
|                                                                                  | Person specification to include knowledge of living and using services locally                                                                                                            |                                                                                                                                                                                                                                  | LEAP               |
|                                                                                  | Recruitment process to take the form of a whole day event or open day                                                                                                                     | Potential peer workers to engage in observed, scenario-based group and pairs work etc during the day, not just a one-to-one interview                                                                                            | Team, Review       |
|                                                                                  | Recruitment is to training (not to job)                                                                                                                                                   | Sufficient people recruited to training to allow for drop-out/ people not moving into a job, plus a reserve (approx. double number required for posts)                                                                           | Team, Review       |
|                                                                                  | Person specification to include having completed recovery training/ have a recovery plan                                                                                                  | Not essential, but to be a requirement of training if not already in place                                                                                                                                                       | Team               |
|                                                                                  | *Role description clearly describes peer's approach around discovering and enabling service user's strengths, empowering the individual to build their own support network post-discharge | Note the peer should not become a substitute for that network for a limited period (linked to competencies in training)                                                                                                          | LEAP, BCTs, Review |
|                                                                                  | *Role description to focus on identifying, signposting and, where requested by service user, accompanying to activities/ support/ opportunities using locally developed resource pack     | Resource pack linked to local resource mapping session in training; to include a) things the individual did before admission, b) new things; peer to have sufficient flexibility in the role to attend activities as appropriate | LEAP, Team, Review |
|                                                                                  | Role description to clearly indicate expectations of the role, with service user to be provided with information sheet clearly indicating expectation of the peer support role            | Noting that role is not about the peer being an advocate or a generic support worker                                                                                                                                             | LEAP               |
|                                                                                  | Person specification to include strong interpersonal skills, interest in helping others etc. to be tested at interview                                                                    |                                                                                                                                                                                                                                  | Review             |
| Recruitment by advertisements in services/ organisations that might employ peers |                                                                                                                                                                                           | Review                                                                                                                                                                                                                           |                    |
| Letters of reference required at recruitment                                     | Can be character references in the absence of work references                                                                                                                             | Review                                                                                                                                                                                                                           |                    |

|                                                                      |                                                                                                                                       |                                                                                                                                                      |                          |
|----------------------------------------------------------------------|---------------------------------------------------------------------------------------------------------------------------------------|------------------------------------------------------------------------------------------------------------------------------------------------------|--------------------------|
|                                                                      | Homework and/ or tests (quizzes) as part of the assessment process                                                                    |                                                                                                                                                      | Review (grey lit.)       |
|                                                                      | Pre-screening telephone interview prior to invitation to recruitment day                                                              | Assessing how comfortable people are talking about their mental health, scenarios around providing support etc                                       | Review                   |
| Domain 2:<br>Training                                                | Training to include work-based placements                                                                                             | Including working alongside existing peers                                                                                                           | Team, Review             |
|                                                                      | Training to include standard Trust induction                                                                                          | Note: this might include Trust's standard breakaway training etc. although peers would not be required to use this as part of their role             | Team                     |
|                                                                      | Training to include locally led 'community asset mapping' session                                                                     |                                                                                                                                                      | Team, LEAP               |
|                                                                      | Training to incorporate locally developed/ delivered sessions where these cover required skills/ competencies                         |                                                                                                                                                      | LEAP, Review             |
|                                                                      | Training to have at least some minimal level of accreditation                                                                         |                                                                                                                                                      | LEAP                     |
|                                                                      | *Training (and supervision) to include a focus on boundaries and managing relationships                                               | For example, on blurred friendship line, especially where there is a pre-existing friendship or there is an attraction between peer and service user | LEAP, Team, Review       |
|                                                                      | Training to include session on preparing for the workplace                                                                            | For example, working on the ward, plus basics around use of phones, office etc.                                                                      | Team, Review             |
|                                                                      | Training (and supervision) to include a focus on keeping yourself well and safe at work                                               | Including the wellbeing and mental health of the peer                                                                                                | Team, Review             |
|                                                                      | *Training (and supervision) to include appropriate sharing of lived experience to role model post-discharge experience                | Linked to competencies in training                                                                                                                   | Team, BCTs, Review, LEAP |
|                                                                      | *Training to be co-delivered by experienced peer workers                                                                              | In similar roles (if not the same)                                                                                                                   | LEAP, Team, Review       |
|                                                                      | Training to include cultural competence, gender issues etc                                                                            |                                                                                                                                                      | Review                   |
|                                                                      | Training to include competence around addressing stigma                                                                               |                                                                                                                                                      | Review                   |
|                                                                      | Training (and supervision) for peer in discussing difficult issues                                                                    | E.g. suicidality, self-harm, drug taking, sexual abuse etc                                                                                           | Team                     |
|                                                                      | *Training to cover key communication and supporting self-management skills                                                            | Peer has a range of core skills - e.g. reflective listening, summarising, goal-planning etc – to use in addition to sharing of lived experience      | LEAP, BCTs, Review, Team |
| *Training structured around core set of values-based competencies    | Exercises and assessments to cover each competency (e.g. mutuality, reciprocity, non-directive working, validating etc)               | Team, BCTs, Review                                                                                                                                   |                          |
| Assessments during and at end of training around each key competency | Including role play type assessments plus readiness to work interview; used to decide who moves from training to full or reserve role | Team, Review                                                                                                                                         |                          |

|                                                                                           |                                                                                                                                       |                                                                                                                                                                                                               |                          |
|-------------------------------------------------------------------------------------------|---------------------------------------------------------------------------------------------------------------------------------------|---------------------------------------------------------------------------------------------------------------------------------------------------------------------------------------------------------------|--------------------------|
|                                                                                           | *Training (and supervision) to include comprehensive coverage of working with risk and safety                                         | Including decision making about what and when to handover to clinical team; if Peer Worker Coordinator does not have clinical experience appropriate clinical link person should be identified in the Trust   | LEAP, Team, Review       |
|                                                                                           | Training (and supervision) to include a focus on keeping yourself well and safe at work                                               | Including the wellbeing and mental health of the peer                                                                                                                                                         | Team, Review             |
| Domain 3:<br>Delivery of peer support                                                     | Peers to accompany people on home visits/ leave while still in hospital, and meet people in their homes while living in the community | Where possible, to support reconnecting with people and places; only where a preference for that is expressed by the service user; must conform to employer's lone working policy                             | Team, LEAP               |
|                                                                                           | *Peers to be part of formal discharge meeting/ care planning meetings where invited by the service user                               | To accompany, support and enable (not to advocate)                                                                                                                                                            | LEAP, Team, Review       |
|                                                                                           | Initial contact on the ward to focus on listening to the service user and relationship building                                       | Focus on building trust, building a rapport, not on the peer telling their story (appropriate sharing of lived experience to make a connection)                                                               | LEAP, Team               |
|                                                                                           | *Peer to support/ enable optional use of service user owned discharge plan, crisis plan and personal recovery plan                    | Discharge tool to focus on what service user wants/ does not want post-discharge, rather than prescriptive planning of activities; all tools, can use locally available or any suitable strengths-based tools | LEAP, Team, BCTs, Review |
|                                                                                           | First meeting with peer post-discharge should be in addition to follow-up by community team                                           | Not instead of, or part of that statutory meeting                                                                                                                                                             | LEAP                     |
|                                                                                           | Clear guidance for peers on telephone, text, email and social media contact                                                           |                                                                                                                                                                                                               | Team                     |
|                                                                                           | Matching of peers to service user by key demographics, experience of services and/ or hobbies & interests                             | As far as possible given size of peer worker team                                                                                                                                                             | Review                   |
|                                                                                           | Peers direct service users to appropriate online resources                                                                            | Including information sites, mental health discussion forums, online self-management/ psycho-social education etc                                                                                             | Review                   |
|                                                                                           | Peer encourages involvement of 'significant others' in any personal/ recovery/ crisis planning                                        |                                                                                                                                                                                                               | Review                   |
|                                                                                           | Peers will only write to (Trust) clinical notes what is agreed with service user                                                      |                                                                                                                                                                                                               | Team, Review             |
|                                                                                           | Health lifestyle and health promotion included in training/ delivery                                                                  |                                                                                                                                                                                                               | Review (grey lit.)       |
|                                                                                           | Medication and symptom management included in training/ delivery                                                                      |                                                                                                                                                                                                               | Review (grey lit.)       |
| Messages linked to recovery planning/goal setting sent by peer worker using text or email |                                                                                                                                       | Review (grey lit.)                                                                                                                                                                                            |                          |

|                                                                                                                        |                                                                                                                                                                        |                                                                                                                                                                                                                                                           |                          |
|------------------------------------------------------------------------------------------------------------------------|------------------------------------------------------------------------------------------------------------------------------------------------------------------------|-----------------------------------------------------------------------------------------------------------------------------------------------------------------------------------------------------------------------------------------------------------|--------------------------|
|                                                                                                                        | Peer Worker to help service user to complete self-assessment and monitoring tools                                                                                      |                                                                                                                                                                                                                                                           | Review (grey lit.)       |
|                                                                                                                        | *Preparation for ending the support to be on the agenda from the outset                                                                                                | Contact reducing from weekly to fortnightly towards the end of peer support, training and supervision to include working with attachment, therapeutic relationship, endings etc (including ending of individual sessions as well as support relationship) | LEAP, BCTs, Team, Review |
|                                                                                                                        | The Peer Worker fulfils a 'navigator' role, helping service user assess health and social care needs, identify providers, make appointments and accompany as necessary |                                                                                                                                                                                                                                                           | Review (grey lit.)       |
| Domain 4: Support and supervision (Note: a number of components included in training domain also apply to supervision) | Regular peer to peer support meeting                                                                                                                                   | Sharing of experiences, strategies etc by peers, plus opportunity to recognise successes in the workplace etc                                                                                                                                             | LEAP, Team               |
|                                                                                                                        | Group supervision for peers from Peer Worker Coordinator                                                                                                               | With option of one-to-one supervision always available                                                                                                                                                                                                    | Team                     |
|                                                                                                                        | Appropriate support always accessible when supervision (Peer Worker Coordinator) is not available                                                                      | By phone or face-to-face, including when Peer Worker Coordinator is unavailable, so peer is never left isolated holding a difficult issue                                                                                                                 | LEAP, Review             |
|                                                                                                                        | Supervision from someone with lived experience essential                                                                                                               | Included in the person specification for the Peer Worker Coordinator (note: if a suitable individual is not available locally for the role external supervision from a peer should be resourced, in addition to line management from within the Trust)    | LEAP, Team               |
|                                                                                                                        | Peer Worker Coordinators to undertake their own recovery planning                                                                                                      |                                                                                                                                                                                                                                                           | Team                     |
|                                                                                                                        | Peer Worker Coordinators should have access to learning sets with people in the same/ equivalent roles                                                                 | Either locally or more widely if necessary                                                                                                                                                                                                                | Team                     |
|                                                                                                                        | Development programme in place for people moving into reserve roles                                                                                                    | To include, at a minimum, a monthly development meeting plus opportunities for placements in, for example, local recovery college and help in applying for other (voluntary or paid) peer roles                                                           | Team                     |
| Domain 5: Team and organisational support                                                                              | Peer Workers require a 'team base'                                                                                                                                     | Including access to office space; somewhere they feel safe and can take time out, meet and build supportive relationships with colleagues (flexibility locally re most appropriate location)                                                              | Team, Review             |
|                                                                                                                        | Links to good employment support services                                                                                                                              | Can be in the Trust or local voluntary sector provider                                                                                                                                                                                                    | Team, LEAP               |
|                                                                                                                        | *Ward and community teams – including managers – should receive a                                                                                                      | Focus on role of peer support alongside current service delivery                                                                                                                                                                                          | Team, LEAP, Review       |

|                                                                                                                           |                                                                          |              |
|---------------------------------------------------------------------------------------------------------------------------|--------------------------------------------------------------------------|--------------|
| team preparation session co-delivered by peers working locally                                                            |                                                                          |              |
| Peer Worker Coordinator, and where possible peers, should visit wards/ teams as part of set up                            | To establish communication, explain processes, address expectations etc. | Team, Review |
| Peer support for discharge should be embedded in Trust's recovery strategy, strategic development, planning documents etc |                                                                          | Team, Review |
| Clinical team preparation sessions should involve team members identifying the assets that peer workers will bring        | Not a teaching session; use of appropriate tools                         | Team         |
| Employment of peers on the workforce should be integrated into HR policies                                                |                                                                          | Review, Team |

\*Core components identified in three or more sources
